# Supplementary material
Source: publisher site journal article supplement (https://www.dovepress.com/article/333904)
Supplement: Supplementary file 1 [file get_supplementary_file.php]

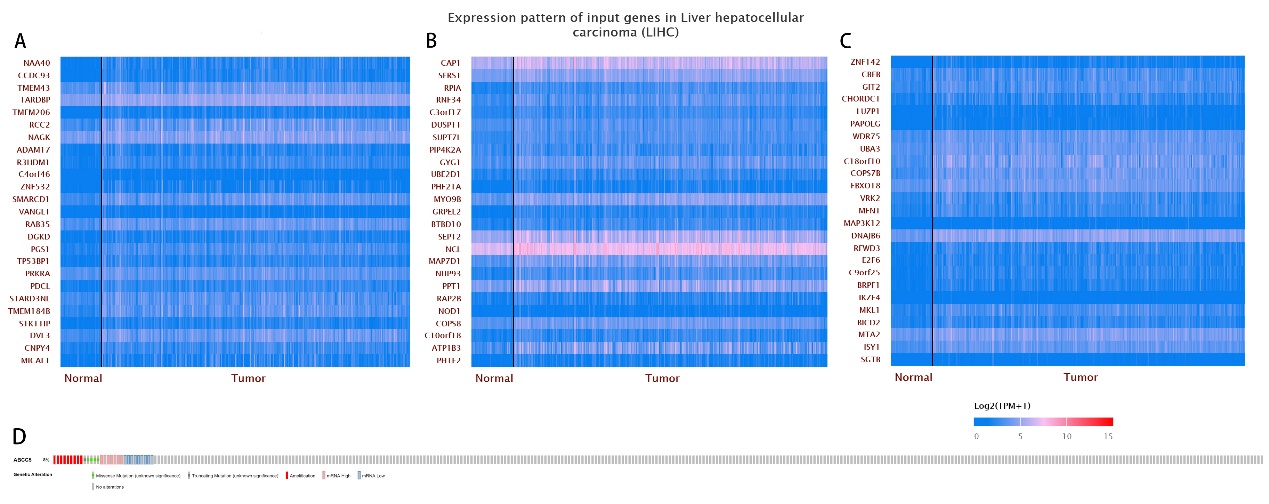


**Supplementary Figure 1**: (A)The heatmap of the top 25 to 50 co-expressed genes with ABCC5. (B) The heatmap of the top 50 to 75 co-expressed genes with ABCC5. (C) The heatmap of the top 75 to 100 co-expressed genes with ABCC5. (D) Altered ABCC5 gene copy numbers was significantly correlated with the immune infiltration levels of several types of immune cell in LIHC (Firehose legacy).
